# Supplementary material for: Neutralization of the induced VEGF-A potentiates the therapeutic effect of an anti-VEGFR2 antibody on gastric cancer in vivo
Source: PubMed Central journal article supplement (PMC8302577; doi:10.1038/s41598-021-94584-9), 2021-07-23
Supplement: 41598_2021_94584_MOESM1_ESM.pdf [file 41598_2021_94584_MOESM1_ESM.pdf]

1 Neutralization of the induced VEGF-A potentiates the therapeutic effect of an

2 anti-VEGFR2 antibody on gastric cancer *in vivo*

3

4 Tetsuo Mashima, Takeru Wakatsuki, Naomi Kawata, Myung-Kyu Jang, Akiko

5 Nagamori, Haruka Yoshida, Kenichi Nakamura, Toshiro Migita, Hiroyuki Seimiya, and

6 Kensei Yamaguchi

7

8 **Supplementary Materials and Methods**

9

10 **Experimental conditions and procedures of mouse xenograft study**

11

12 Study design

13 Experimental groups: Upon subcutaneous injection of human gastric cancer cells, mice

14 were divided into 4 groups (five - eight mice per group) and treated with vehicle,

15 anti-VEGFR2 antibody, anti-VEGF-A antibody, or anti-VEGFR2 antibody + anti-VEGF-A

16 antibody. The cohorts came from 2 repeated experiments.

17 Experimental unit: 6-week-old BALB/c-nu/nu mice (female).

18 Experimental procedures

19 Injection of human gastric cancer cells: MKN45 cells ( $3 \times 10^6$  cells/mouse) were  
20 suspended in 50  $\mu$ L Hanks' balanced salt solution (HBSS) and were implanted  
21 subcutaneously in the right flanks of 6-week-old BALB/c-nu/nu mice.

22 Treatment: Therapeutic experiments (five - eight mice per group) were started  
23 approximately 14 days after implantation when tumors reached 100–200  $\text{mm}^3$ , as measured  
24 with calipers (day 0). The anti-mouse VEGFR2 antibody (DC101) (10 or 20 mg/kg),  
25 anti-mouse VEGF-A antibody (2G11-2A05) (5 mg/kg), and vehicle (PBS) were  
26 administered intraperitoneally twice a week for 2 weeks.

27 Weighting: Body weight and tumor size were measured during and after treatment every  
28 week. The length (L) and width (W) of the tumor mass was measured, and the tumor  
29 volume (TV) was calculated as:  $TV = (L \times W^2)/2$ .

30 Euthanasia: At the end of the experiments, mice were euthanized by cervical dislocation.

31 Experimental animals

32 6-week-old BALB/c-nu/nu mice (female) (Charles River Laboratories, Japan), weight

33 15-25g.

34 Housing and husbandry

35 Animal facility: Standard animal experiment room at JFCR with automatic system of

36 temperature, humidity and light regulation (temperature: 25 + 1°C; light/dark cycle: 12/12h;

37 humidity: 50 + 10%).

38 Diet: Access to food [sterilized normal diet, CE-2 (CLEA Japan, Inc., Japan)] and

39 sterilized water.

40 Cage: Sterilized plastic cages.

41 Cage companions: 3 animals/cage.

42 Bedding materials: high adsorbing bedding materials without dust. Changed every week.

43 Environmental enrichment was done with sterile materials.

44 Sample size

45 5-8 mice/group (26 mice totally). We determined the sample size based on our

46 previously-performed successful *in vivo* studies<sup>23</sup>.

47 Allocating animals to experimental groups

48 Mice were divided into the above-mentioned 4 groups after randomization.

49 Experimental outcomes

50 1. To determine whether anti-VEGFR2 antibody + anti-VEGF-A antibody treatment  
51 could enhance the antitumor efficacy of anti-VEGFR2 antibody or anti-VEGF-A antibody  
52 *in vivo*.

53 2. To examine whether anti-VEGFR2 antibody + anti-VEGF-A antibody treatment would  
54 exacerbate the toxicity of anti-VEGFR2 antibody or anti-VEGF-A antibody.

55 3. To evaluate intra-tumor molecular changes after the anti-VEGFR2 antibody +  
56 anti-VEGF-A antibody treatment.

57 Statistical methods

58 Statistical analysis was performed using ANOVA, followed by the Tukey–Kramer  
59 post-hoc test.

60

61 **Immunohistochemistry**

62 Xenograft tumor samples were obtained on day 14 after the start of each treatment and  
63 formalin-fixed, paraffin-embedded tissues were prepared as described in Materials and  
64 Methods. After deparaffinization and heat-induced epitope retrieval, the sections were

65 incubated with rabbit anti-human Ki67 antibody (Abcam, Cambridge, UK) at 4°C  
66 overnight. The Liquid DAB+Substrate Chromogen System K3468 (Agilent  
67 Technologies (Dako)) was used for detection.

68

### 69 **Supplementary Reference**

70 1. Kanehisa, M., Goto, S., Kawashima, S. & Nakaya, A. The KEGG databases at  
71 GenomeNet. *Nucleic Acids Res.* **30**, 42-46 (2002).

72 **Supplementary Figure Legends**

73

74 **Supplementary Fig. 1**

75 Detection of human VEGF-A (hVEGF-A) or mouse VEGF-A (mVEGF-A) levels by  
76 Enzyme-Linked Immunosorbent assays (ELISAs) using species-specific antibodies.  
77 Human (A) and mouse (B) VEGF-A levels were measured as described in Materials and  
78 Methods with serially diluted purified human and mouse VEGF-A protein solutions  
79 (15.6–250 pg/ml).

80 The figures were generated by Microsoft Powerpoint (16.16.27)  
81 (<https://www.microsoft.com/ja-jp/microsoft-365/powerpoint>).

82

83 **Supplementary Fig. 2**

84 (A) Time course analysis of plasma murine VEGF-A induction after anti-VEGFR2  
85 antibody treatment *in vivo*. The anti-VEGFR2 antibody (10 mg/kg) was administered  
86 intraperitoneally at day 0. At 0, 24, 48, and 72 h after treatment, mouse plasma was  
87 collected (N=3), and the murine VEGF-A concentration was measured as described in  
88 Materials and Methods. (B)–(D) Alterations in murine placental growth factor (PlGF),  
89 VEGF-C, and VEGF-D levels in mouse plasma following anti-VEGFR2 antibody  
90 administration were shown. BALB/c nude mice were injected with MKN45 cells, and  
91 mice were treated intraperitoneally with the vehicle (PBS) or anti-VEGFR2 antibody  
92 (20 mg/kg) as described in Fig. 2. At 14 days after the start of treatment, mouse plasma  
93 was collected, and murine PlGF, VEGF-C, and VEGF-D concentrations were measured  
94 as described in Materials and Methods.

95 The figures were generated by Microsoft Powerpoint (16.16.27)  
96 (<https://www.microsoft.com/ja-jp/microsoft-365/powerpoint>).

97

98 **Supplementary Fig. 3**

99 Immunohistochemical staining of Ki67 in MKN45 xenograft tumor tissues after each  
100 treatment. Xenograft tumor samples were obtained on day 14 after the start of each  
101 treatment. Typical staining results were shown. % of Ki67-positive cells were counted  
102 in triplicate samples and calculated as in Supplementary Table 1.

103 The figures were generated by Microsoft Powerpoint (16.16.27)  
104 (<https://www.microsoft.com/ja-jp/microsoft-365/powerpoint>).

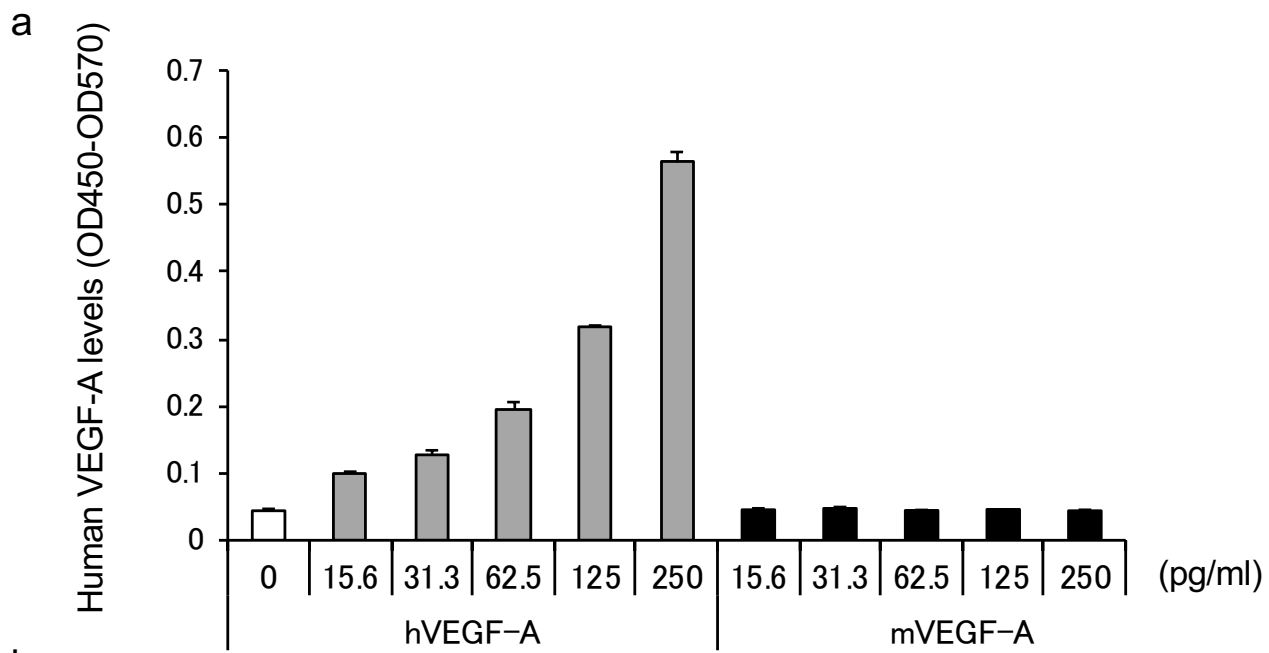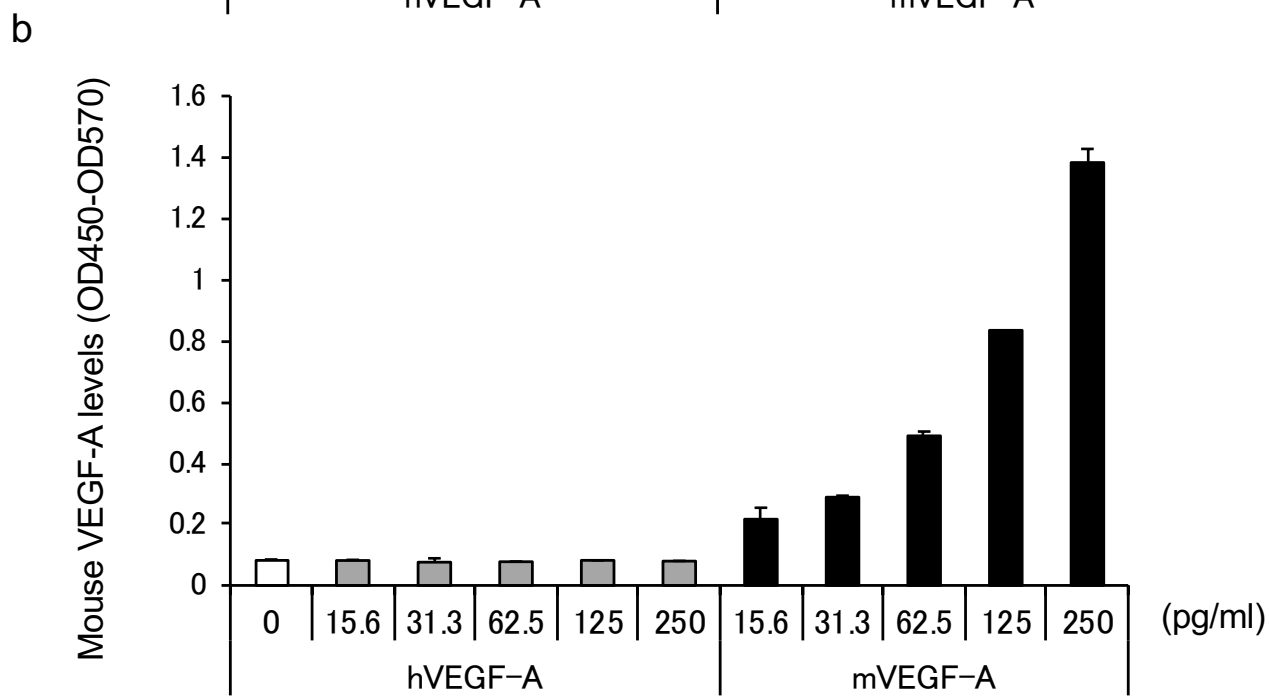

a

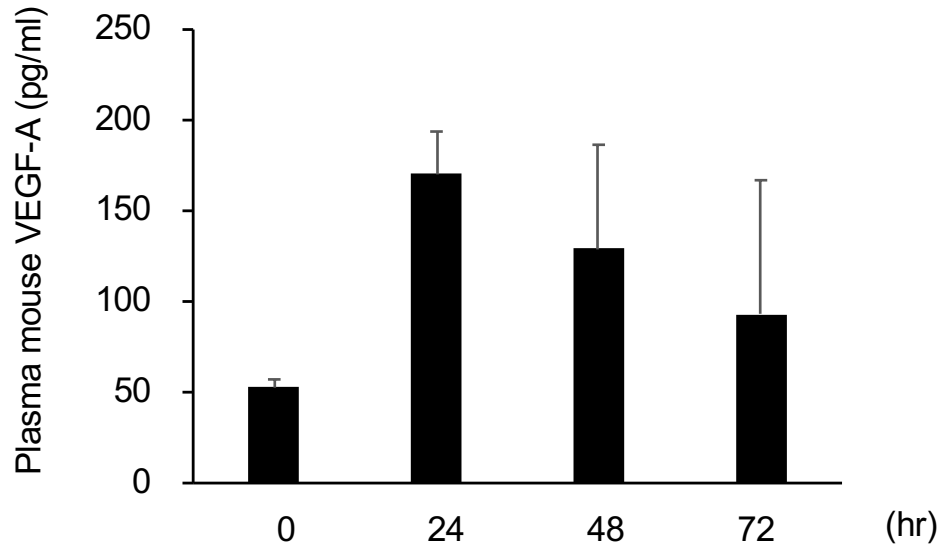

b

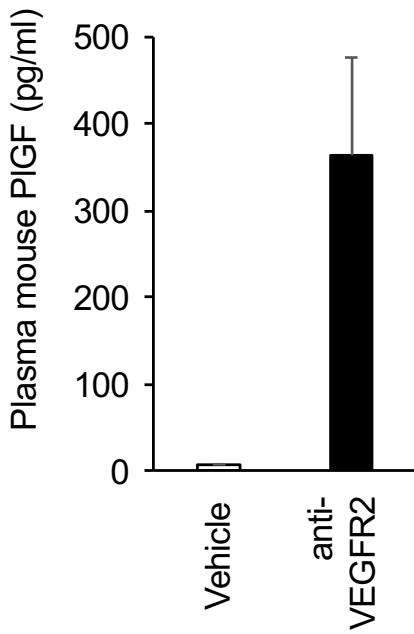

c

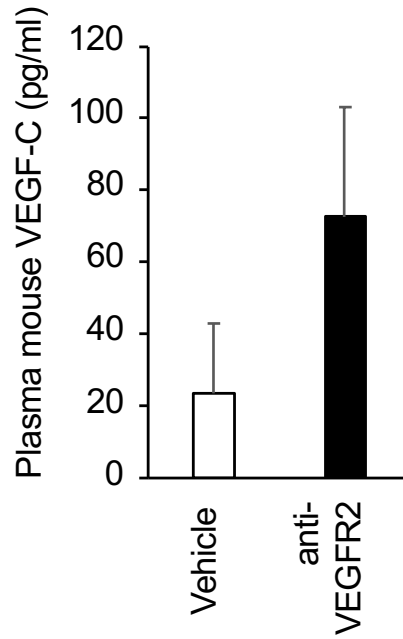

d

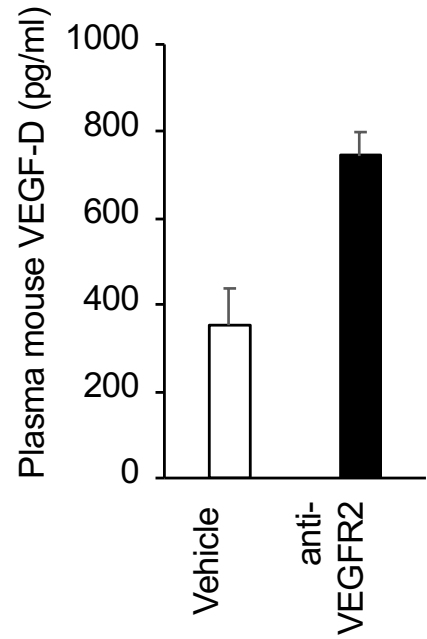



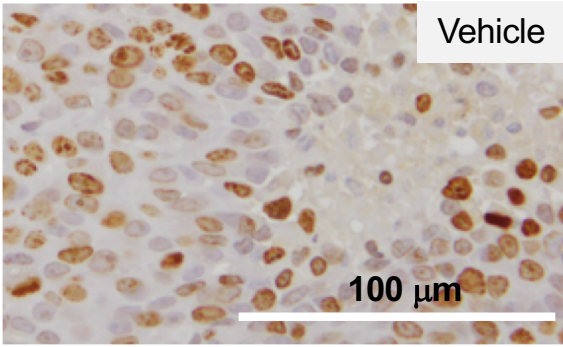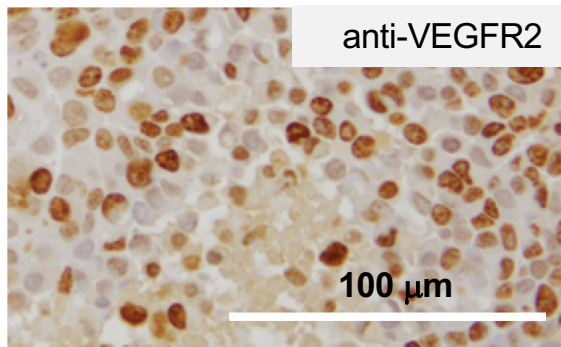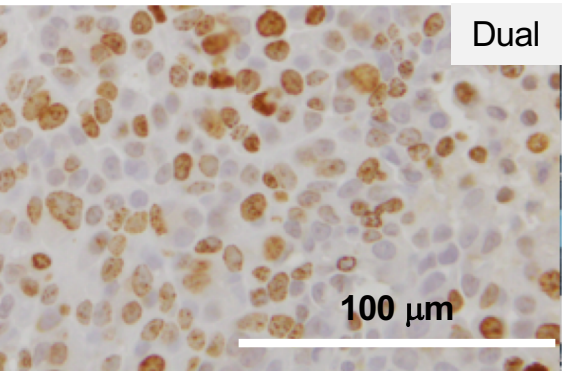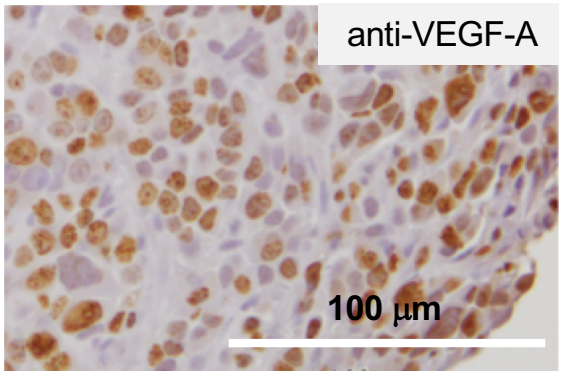

**Suppl Table1 Ratio of Ki67-positive cancer cells in MKN45 xenograft tumors after VEGFR2 and VEGF-A targeting therapy**

| Treatments  | % Ki-67(+) |
|-------------|------------|
| Vehicle     | 73.9 + 5.8 |
| anti-VEGFR2 | 69.8 + 9.8 |
| Dual        | 50.0+ 15.8 |
| anti-VEGF-A | 53.9 + 7.2 |

Immunohistochemical staining of Ki67 in MKN45 xenograft tumor tissues after each treatment was performed as described in Supplementary Fig.3. The numbers of Ki67-positive cells were counted in triplicate samples.

**Suppl Table2 Pathological analysis of mouse tissues after treatment with anti-VEGFR2 and anti-VEGF-A antibodies**

|        |                       | Vehicle |    |    |    | anti-VEGFR2 |    |    |    |    | Dual |    |    |    | anti-VEGF-A |    |    |
|--------|-----------------------|---------|----|----|----|-------------|----|----|----|----|------|----|----|----|-------------|----|----|
|        |                       | #1      | #2 | #3 | #4 | #1          | #2 | #3 | #4 | #5 | #1   | #2 | #3 | #4 | #1          | #2 | #3 |
| Kidney | Infarction            | -       | ±  | -  | -  | +           | -  | -  | ±  | +  | +    | -  | -  | -  | -           | -  | 2+ |
|        | Atrophic tubules      | -       | -  | -  | -  | -           | -  | -  | -  | -  | -    | ±  | -  | -  | -           | -  | -  |
| Liver  | Bile duct hyperplasia | -       | -  | -  | -  | -           | -  | -  | -  | -  | -    | -  | -  | -  | -           | -  | ±  |

Pathological analysis in the treated mouse kidney was done on periodic acid-Schiff (PAS) stained samples and the analysis in the liver was done with hematoxylin and eosin (H&E) staining samples. (-), not observed, (±), marginal, (+), weak, (2+), medium, (3+), strong

**Suppl Table3 Enriched annotation clusters (Gene Ontology) related to the genes upregulated by anti-VEGFR2 antibody treatment**

Annotation Cluster 1 Enrichment Score: 3.57

| Term                                          | PValue    |
|-----------------------------------------------|-----------|
| GO:0048255 mRNA stabilization                 | 0.0000010 |
| GO:0003730 mRNA 3'-UTR binding                | 0.0038201 |
| GO:0045727 positive regulation of translation | 0.0050826 |

Annotation Cluster 2 Enrichment Score: 1.83

| Term                                                | PValue    |
|-----------------------------------------------------|-----------|
| GO:0004674 protein serine/threonine kinase activity | 0.0040873 |
| GO:0005524 ATP binding                              | 0.0208823 |
| GO:0006468 protein phosphorylation                  | 0.0383111 |

DAVID analysis (<https://david.ncicrf.gov/summary.jsp>) on the genes upregulated by anti-VEGFR2 antibody treatment (classified as #2 in Fig. 5(A)) was performed. For the analysis, we extracted and analyzed the gene sets that were >60% upregulated by anti-VEGFR2 antibody treatment but not by the anti-VEGF-A antibody compared with the vehicle control. Functional annotation clustering of Gene Ontology (GO) terms was performed and enriched clusters (enriched score>1.5) were shown.

**Suppl Table4 Enriched annotation clusters (KEGG pathway) related to the genes upregulated by anti-VEGFR2 antibody treatment**

| Annotation Cluster 1                                              |           | Enrichment Score: 1.06 |
|-------------------------------------------------------------------|-----------|------------------------|
| Term                                                              | PValue    |                        |
| hsa04068:FoxO signaling pathway                                   | 0.0067908 |                        |
| hsa04550:Signaling pathways regulating pluripotency of stem cells | 0.2604450 |                        |
| hsa05142:Chagas disease (American trypanosomiasis)                | 0.3801145 |                        |

| Annotation Cluster 2                       |           | Enrichment Score: 1.04 |
|--------------------------------------------|-----------|------------------------|
| Term                                       | PValue    |                        |
| hsa05223:Non-small cell lung cancer        | 0.0053154 |                        |
| hsa04068:FoxO signaling pathway            | 0.0067908 |                        |
| hsa04910:Insulin signaling pathway         | 0.0301066 |                        |
| hsa05205:Proteoglycans in cancer           | 0.0404687 |                        |
| hsa04510:Focal adhesion                    | 0.0456465 |                        |
| hsa05214:Glioma                            | 0.0487006 |                        |
| hsa05212:Pancreatic cancer                 | 0.0487006 |                        |
| hsa04917:Prolactin signaling pathway       | 0.0604197 |                        |
| hsa05220:Chronic myeloid leukemia          | 0.0624907 |                        |
| hsa04722:Neurotrophin signaling pathway    | 0.0650015 |                        |
| hsa04012:ErbB signaling pathway            | 0.0973130 |                        |
| hsa05215:Prostate cancer                   | 0.0998686 |                        |
| hsa04915:Estrogen signaling pathway        | 0.1296779 |                        |
| hsa05213:Endometrial cancer                | 0.1400123 |                        |
| hsa04664:Fc epsilon RI signaling pathway   | 0.2123093 |                        |
| hsa04010:MAPK signaling pathway            | 0.2156589 |                        |
| hsa05200:Pathways in cancer                | 0.2279583 |                        |
| hsa05160:Hepatitis C                       | 0.2366476 |                        |
| hsa05206:MicroRNAs in cancer               | 0.2946965 |                        |
| hsa04014:Ras signaling pathway             | 0.3202390 |                        |
| hsa04660:T cell receptor signaling pathway | 0.3618880 |                        |
| hsa04062:Chemokine signaling pathway       | 0.6870961 |                        |

DAVID analysis (<https://david.ncicrf.gov/summary.jsp>) on the genes upregulated by anti-VEGFR2 antibody treatment (classified as #2 in Fig. 5(A)) was performed. For the analysis, we extracted and analyzed the gene sets that were >60% upregulated by anti-VEGFR2 antibody treatment but not by the anti-VEGF-A antibody compared with the vehicle control. Functional annotation clustering of KEGG pathways (Suppl. Ref.1) was performed and enriched clusters (enriched score >1.0) were shown.
